# Supplementary material for: Epithelial Dual Oxidase 2 Shapes the Mucosal Microbiome and Contributes to Inflammatory Susceptibility
Source: MDPI journal article supplement (doi:10.3390/antiox12101889), 2023-10-21
Supplement: s1 [file s1]

## Supplemental Information

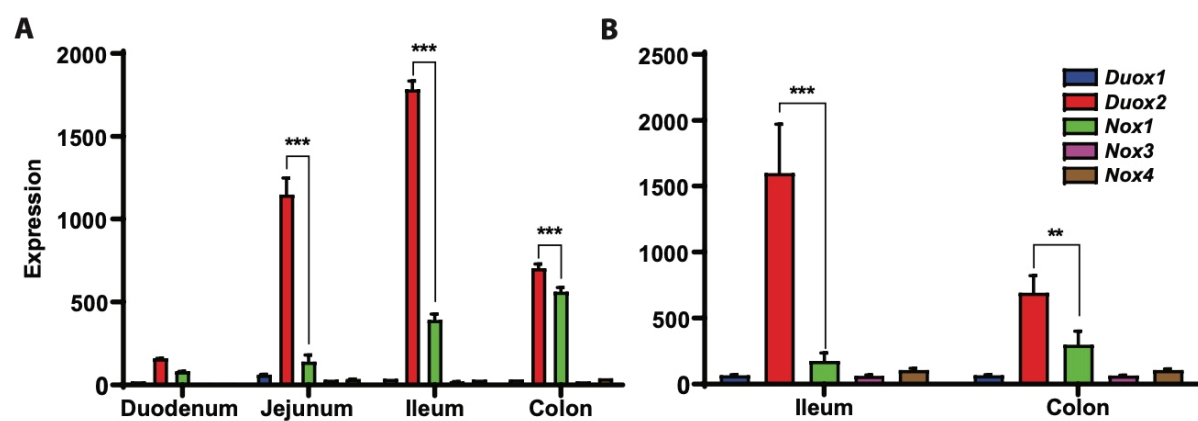

**Figure S1: Expression of NOX family members along the mouse intestinal tract and isolated IECs.** Expression data for non-fractionated tissue [1] and for isolated IECs [2] were retrieved from published microarray studies and analyzed for NOX family members. \*\*  $p < 0.01$  and \*\*\*  $p < 0.001$  FDR-corrected  $p$  values of moderated  $t$  test (for details see the original publications).

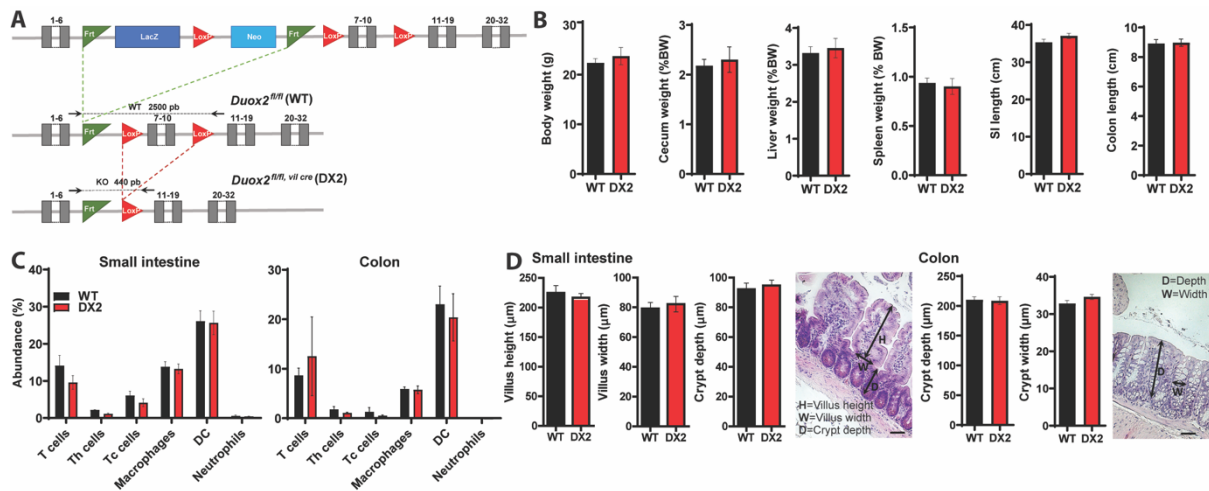

**Figure S2: Phenotyping of unchallenged *Duox2*<sup>ΔIEC</sup> mice.** **A)** Strategy for generating *Duox2*<sup>ΔIEC</sup> mice. IEC-specific DUOX2-deficient mice were generated by crossing *Duox2* floxed (*Duox2*<sup>fl/fl</sup>) mice with Villin::CRE transgenic mice expressing CRE recombinase under the control of the IEC-specific *Villin1* promoter, resulting in specific conditional deletion of *Duox2* exons 7-10 in IECs and a non-functional DUOX2 protein due to a premature stop codon. **B)** Body and organ measures of *Duox2*<sup>ΔIEC</sup> and littermate control mice. Deletion of DUOX2 in IECs did not impact any of the observed organs or body weight. BW = body weight, SI = small intestine. **C)** Immune cell profile in lamina propria from small intestine and colon of *Duox2*<sup>ΔIEC</sup> and littermate control mice. Th = CD4<sup>+</sup> T helper cells, Tc: CD8<sup>+</sup> cytotoxic T cells. **D)** Intestinal epithelial architecture of *Duox2*<sup>ΔIEC</sup> and littermate control mice. Villus height and width along with crypt depth of small intestine samples, and depth and width of colonic crypts were quantified in H&E-stained intestinal sections. The scale bar in the representative images corresponds to 50 μm.

**Table S1.** List of primers used in this study.

| Sequence 5'-->3'              | Gene         | Organism |
|-------------------------------|--------------|----------|
| Forward -CCCACGTTACCATTTCATCA | <i>Duox1</i> | Mouse    |
| CATCTGCATAGCTGGCTGGA          |              |          |
| ACGCAGCTCTGTGTCAAAGGT         | <i>Duox2</i> | Mouse    |
| TGATGAACGAGACTCGACAGC         |              |          |
| ATCCTCACAATTGTTCCATT          | <i>Nox1</i>  | Mouse    |
| TGACAACCTTGGAATCACGA          |              |          |
| CCCTTTGGTACAGCCAGTGAAGAT      | <i>Nox2</i>  | Mouse    |
| CAATCCCGGCTCCCACTAACATCA      |              |          |
| CGACGAATTCAAGCAGATTGC         | <i>Nox3</i>  | Mouse    |
| AAGAGTCTTTGACATGGCTTTGG       |              |          |
| GGATCACAGAAGGTCCCTAGCAG       | <i>Nox4</i>  | Mouse    |
| GCGGCTACATGCACACCTGAGAA       |              |          |
| GGCTGTATTCCCCTCCATCG          | <i>Actb</i>  | Mouse    |
| CCAGTTGGTAACAATGCCATGT        |              |          |

## Supplementary References

1. Larsson, E.; Tremaroli, V.; Lee, Y.S.; Koren, O.; Nookaew, I.; Fricker, A.; Nielsen, J.; Ley, R.E.; Bäckhed, F. Analysis of Gut Microbial Regulation of Host Gene Expression along the Length of the Gut and Regulation of Gut Microbial Ecology through MyD88. *Gut* **2012**, *61*, 1124–1131, doi:10.1136/gutjnl-2011-301104.
2. Sommer, F.; Nookaew, I.; Sommer, N.; Fogelstrand, P.; Bäckhed, F. Site-Specific Programming of the Host Epithelial Transcriptome by the Gut Microbiota. *Genome Biol* **2015**, *16*, 62, doi:10.1186/s13059-015-0614-4.
